# Supplementary material for: Consumers’ Attitudes Facing Entomophagy: Polish Case Perspectives
Source: PubMed Central journal article supplement (PMC7177372; doi:10.3390/ijerph17072427), 2020-04-02
Supplement: ijerph-17-02427-s001.pdf [file ijerph-17-02427-s001.pdf]

**Table S1.** Distribution of answers to survey questions by sex, place of residence and income in case of statistically significant dependences.

| Variable                                                            | Category                                 | Yes |       | No I don't know |       |    |       |
|---------------------------------------------------------------------|------------------------------------------|-----|-------|-----------------|-------|----|-------|
| Have you eaten edible insects before? (question 5)                  |                                          |     |       |                 |       |    |       |
|                                                                     |                                          | n   | %     | n               | %     | n  | %     |
| Income                                                              | 500.00–1000.00 PL                        | 5   | 4.55  | 105             | 95.45 | 0  | 0.00  |
|                                                                     | 1000.01–1500.00 PL                       | 6   | 4.20  | 132             | 92.31 | 5  | 3.50  |
|                                                                     | 1500.01–2000.00 PL                       | 5   | 5.75  | 79              | 90.80 | 3  | 3.45  |
|                                                                     | >2000.00 PL                              | 17  | 14.91 | 96              | 84.21 | 1  | 0.88  |
| Is insect eating disgusting for you? (question 6)                   |                                          |     |       |                 |       |    |       |
| Sex                                                                 | woman                                    | 154 | 52.38 | 85              | 28.91 | 55 | 18.71 |
|                                                                     | man                                      | 51  | 31.88 | 81              | 50.63 | 28 | 17.50 |
| Place of residence                                                  | village                                  | 59  | 47.20 | 38              | 30.40 | 28 | 22.40 |
|                                                                     | city up to 20,000 inhabitants            | 29  | 58.00 | 10              | 20.00 | 11 | 22.00 |
|                                                                     | city from 20,000 to 100,000 inhabitants  | 37  | 41.11 | 40              | 44.44 | 13 | 14.44 |
|                                                                     | city from 100,000 to 500,000 inhabitants | 23  | 62.16 | 11              | 29.73 | 3  | 8.11  |
|                                                                     | city of more than 500,000 inhabitants    | 57  | 37.50 | 67              | 44.08 | 28 | 18.42 |
| Income                                                              | 500.00–1000.00 PL                        | 62  | 56.36 | 28              | 25.45 | 20 | 18.18 |
|                                                                     | 1000.01–1500.00 PL                       | 70  | 48.95 | 50              | 34.97 | 23 | 16.08 |
|                                                                     | 1500.01–2000.00 PL                       | 35  | 40.23 | 36              | 41.38 | 16 | 18.39 |
|                                                                     | >2000.00 PL                              | 38  | 33.33 | 52              | 45.61 | 24 | 21.05 |
| Does the idea of eating insects make you feel sick? (question 7)    |                                          |     |       |                 |       |    |       |
| Sex                                                                 | woman                                    | 135 | 45.92 | 122             | 41.50 | 37 | 12.59 |
|                                                                     | man                                      | 40  | 25.00 | 103             | 64.38 | 17 | 10.63 |
| Income                                                              | 500.00–1000.00 PL                        | 51  | 46.36 | 41              | 37.27 | 18 | 16.36 |
|                                                                     | 1000.01–1500.00 PL                       | 58  | 40.56 | 69              | 48.25 | 16 | 11.19 |
|                                                                     | 1500.01–2000.00 PL                       | 34  | 39.08 | 48              | 55.17 | 5  | 5.75  |
|                                                                     | >2000.00 PL                              | 32  | 28.07 | 67              | 58.77 | 15 | 13.16 |
| Would you accept edible insects in your diet? (question 8)          |                                          |     |       |                 |       |    |       |
| Sex                                                                 | woman                                    | 39  | 13.27 | 198             | 67.35 | 57 | 19.39 |
|                                                                     | man                                      | 42  | 26.25 | 70              | 43.75 | 48 | 30.00 |
| Income                                                              | 500.00–1000.00 PL                        | 11  | 10.00 | 81              | 73.64 | 18 | 16.36 |
|                                                                     | 1000.01–1500.00 PL                       | 24  | 16.78 | 84              | 58.74 | 35 | 24.48 |
|                                                                     | 1500.01–2000.00 PL                       | 22  | 25.29 | 48              | 55.17 | 17 | 19.54 |
|                                                                     | >2000.00 PL                              | 24  | 21.05 | 55              | 48.25 | 35 | 30.70 |
| Would you accept bread from insect flour in your diet? (question 9) |                                          |     |       |                 |       |    |       |
| Sex                                                                 | woman                                    | 72  | 24.49 | 159             | 54.08 | 63 | 21.43 |
|                                                                     | man                                      | 72  | 45.00 | 56              | 35.00 | 32 | 20.00 |
| Income                                                              | 500.00–1000.00 PL                        | 27  | 24.55 | 70              | 63.64 | 13 | 11.82 |
|                                                                     | 1000.01–1500.00 PL                       | 41  | 28.67 | 65              | 45.45 | 37 | 25.87 |
|                                                                     | 1500.01–2000.00 PL                       | 31  | 35.63 | 33              | 37.93 | 23 | 26.44 |

|                                                                        |  |                                          |     |       |     |       |    |       |
|------------------------------------------------------------------------|--|------------------------------------------|-----|-------|-----|-------|----|-------|
|                                                                        |  | >2000.00 PL                              | 45  | 39.47 | 47  | 41.23 | 22 | 19.30 |
| Would you accept in your diet biscuit from insect flour? (question 10) |  |                                          |     |       |     |       |    |       |
| Sex                                                                    |  | woman                                    | 69  | 23.47 | 160 | 54.42 | 65 | 22.11 |
|                                                                        |  | man                                      | 66  | 41.25 | 59  | 36.88 | 35 | 21.88 |
| Income                                                                 |  | 500.00–1000.00 PL                        | 25  | 22.73 | 70  | 63.64 | 15 | 13.64 |
|                                                                        |  | 1000.01–1500.00 PL                       | 38  | 26.57 | 64  | 44.76 | 41 | 28.67 |
|                                                                        |  | 1500.01–2000.00 PL                       | 31  | 35.63 | 34  | 39.08 | 22 | 25.29 |
|                                                                        |  | >2000.00 PL                              | 41  | 35.96 | 51  | 44.74 | 22 | 19.30 |
| Would you accept insects in animal feeding (poultry)? (question 11)    |  |                                          |     |       |     |       |    |       |
| Sex                                                                    |  | woman                                    | 169 | 57.48 | 83  | 28.23 | 42 | 14.29 |
|                                                                        |  | man                                      | 115 | 71.88 | 23  | 14.38 | 22 | 13.75 |
| Would you accept insects in animal feeding (pork)? (question 11)       |  |                                          |     |       |     |       |    |       |
| Sex                                                                    |  | woman                                    | 164 | 55.78 | 85  | 28.91 | 45 | 15.31 |
|                                                                        |  | man                                      | 112 | 70.00 | 22  | 13.75 | 26 | 16.25 |
| Place of residence                                                     |  | village                                  | 75  | 60.00 | 32  | 25.60 | 18 | 14.40 |
|                                                                        |  | city up to 20,000 inhabitants            | 26  | 52.00 | 15  | 30.00 | 9  | 18.00 |
|                                                                        |  | city from 20,000 to 100,000 inhabitants  | 53  | 58.89 | 26  | 28.89 | 11 | 12.22 |
|                                                                        |  | city from 100,000 to 500,000 inhabitants | 18  | 48.65 | 6   | 16.22 | 13 | 35.14 |
|                                                                        |  | city of more than 500,000 inhabitants    | 104 | 68.42 | 28  | 18.42 | 20 | 13.16 |
| Would you accept insects in animal feeding (beef)? (question 11)       |  |                                          |     |       |     |       |    |       |
| Sex                                                                    |  | woman                                    | 164 | 55.78 | 83  | 28.23 | 47 | 15.99 |
|                                                                        |  | man                                      | 116 | 72.50 | 21  | 13.13 | 23 | 14.38 |
| Place of residence                                                     |  | village                                  | 75  | 60.00 | 32  | 25.60 | 18 | 14.40 |
|                                                                        |  | city up to 20,000 inhabitants            | 25  | 50.00 | 17  | 34.00 | 8  | 16.00 |
|                                                                        |  | city from 20,000 to 100,000 inhabitants  | 58  | 64.44 | 23  | 25.56 | 9  | 10.00 |
|                                                                        |  | city from 100,000 to 500,000 inhabitants | 18  | 48.65 | 5   | 13.51 | 14 | 37.84 |
|                                                                        |  | city of more than 500,000 inhabitants    | 104 | 68.42 | 27  | 17.76 | 21 | 13.82 |
| Would you accept insects in animal feeding (fish)? (question 11)       |  |                                          |     |       |     |       |    |       |
| Sex                                                                    |  | woman                                    | 173 | 58.84 | 76  | 25.85 | 45 | 15.31 |
|                                                                        |  | man                                      | 113 | 70.63 | 25  | 15.63 | 22 | 13.75 |
| Place of residence                                                     |  | village                                  | 76  | 60.80 | 30  | 24.00 | 19 | 15.20 |
|                                                                        |  | city up to 20,000 inhabitants            | 27  | 54.00 | 14  | 28.00 | 9  | 18.00 |
|                                                                        |  | city from 20,000 to 100,000 inhabitants  | 58  | 64.44 | 25  | 27.78 | 7  | 7.78  |
|                                                                        |  | city from 100,000 to 500,000 inhabitants | 18  | 48.65 | 7   | 18.92 | 12 | 32.43 |
|                                                                        |  | city of more than 500,000 inhabitants    | 107 | 70.39 | 25  | 16.45 | 20 | 13.16 |
| Would you like to taste whole insects served sauté? (question 12)      |  |                                          |     |       |     |       |    |       |

|                                                                                            |  |                                          |     |       |     |       |    |       |
|--------------------------------------------------------------------------------------------|--|------------------------------------------|-----|-------|-----|-------|----|-------|
|                                                                                            |  | woman                                    | 31  | 10.54 | 219 | 74.49 | 44 | 14.97 |
| Sex                                                                                        |  | man                                      | 42  | 26.25 | 94  | 58.75 | 24 | 15.00 |
|                                                                                            |  | village                                  | 12  | 9.60  | 96  | 76.80 | 17 | 13.60 |
| Place of residence                                                                         |  | city up to 20,000 inhabitants            | 5   | 10.00 | 40  | 80.00 | 5  | 10.00 |
|                                                                                            |  | city from 20,000 to 100,000 inhabitants  | 18  | 20.00 | 62  | 68.89 | 10 | 11.11 |
|                                                                                            |  | city from 100,000 to 500,000 inhabitants | 4   | 10.81 | 22  | 59.46 | 11 | 29.73 |
|                                                                                            |  | city of more than 500,000 inhabitants    | 34  | 22.37 | 93  | 61.18 | 25 | 16.45 |
| Income                                                                                     |  | 500.00–1000.00 PL                        | 8   | 7.27  | 87  | 79.09 | 15 | 13.64 |
|                                                                                            |  | 1000.01–1500.00 PL                       | 18  | 12.59 | 102 | 71.33 | 23 | 16.08 |
|                                                                                            |  | 1500.01–2000.00 PL                       | 20  | 22.99 | 56  | 64.37 | 11 | 12.64 |
|                                                                                            |  | >2000.00 PL                              | 27  | 23.68 | 68  | 59.65 | 19 | 16.67 |
| Would you like to try whole insects with the addition of spices (question 13)              |  |                                          |     |       |     |       |    |       |
|                                                                                            |  | woman                                    | 85  | 28.91 | 176 | 59.86 | 33 | 11.22 |
| Sex                                                                                        |  | man                                      | 74  | 46.25 | 70  | 43.75 | 16 | 10.00 |
|                                                                                            |  | village                                  | 35  | 28.00 | 75  | 60.00 | 15 | 12.00 |
| Place of residence                                                                         |  | city up to 20,000 inhabitants            | 12  | 24.00 | 32  | 64.00 | 6  | 12.00 |
|                                                                                            |  | city from 20,000 to 100,000 inhabitants  | 26  | 28.89 | 54  | 60.00 | 10 | 11.11 |
|                                                                                            |  | city from 100,000 to 500,000 inhabitants | 15  | 40.54 | 18  | 48.65 | 4  | 10.81 |
|                                                                                            |  | city of more than 500,000 inhabitants    | 71  | 46.71 | 67  | 44.08 | 14 | 9.21  |
| Income                                                                                     |  | 500.00–1000.00 PL                        | 27  | 24.55 | 73  | 66.36 | 10 | 9.09  |
|                                                                                            |  | 1000.01–1500.00 PL                       | 47  | 32.87 | 77  | 53.85 | 19 | 13.29 |
|                                                                                            |  | 1500.01–2000.00 PL                       | 36  | 41.38 | 46  | 52.87 | 5  | 5.75  |
|                                                                                            |  | >2000.00 PL                              | 49  | 42.98 | 50  | 43.86 | 15 | 13.16 |
| Would you like to try whole insects covered with chocolate? (question 13)                  |  |                                          |     |       |     |       |    |       |
|                                                                                            |  | woman                                    | 58  | 19.73 | 202 | 68.71 | 34 | 11.56 |
| Sex                                                                                        |  | man                                      | 54  | 33.75 | 78  | 48.75 | 28 | 17.50 |
| Income                                                                                     |  | 500.00–1000.00 PL                        | 16  | 14.55 | 81  | 73.64 | 13 | 11.82 |
|                                                                                            |  | 1000.01–1500.00 PL                       | 36  | 25.17 | 82  | 57.34 | 25 | 17.48 |
|                                                                                            |  | 1500.01–2000.00 PL                       | 23  | 26.44 | 57  | 65.52 | 7  | 8.05  |
|                                                                                            |  | >2000.00 PL                              | 37  | 32.46 | 60  | 52.63 | 17 | 14.91 |
| Would you like to try insects in an invisible form – flour added to biscuit? (question 14) |  |                                          |     |       |     |       |    |       |
|                                                                                            |  | woman                                    | 102 | 34.69 | 154 | 52.38 | 38 | 12.93 |
| Sex                                                                                        |  | man                                      | 74  | 46.25 | 60  | 37.50 | 26 | 16.25 |
| Would you like to try insects in an invisible form – flour added to bread? (question 14)   |  |                                          |     |       |     |       |    |       |
|                                                                                            |  | woman                                    | 111 | 37.76 | 142 | 48.30 | 41 | 13.95 |
| Sex                                                                                        |  | man                                      | 82  | 51.25 | 56  | 35.00 | 22 | 13.75 |
| Income                                                                                     |  | 500.00–1000.00 PL                        | 42  | 38.18 | 59  | 53.64 | 9  | 8.18  |
|                                                                                            |  | 1000.01–1500.00 PL                       | 53  | 37.06 | 63  | 44.06 | 27 | 18.88 |
|                                                                                            |  | 1500.01–2000.00 PL                       | 41  | 47.13 | 35  | 40.23 | 11 | 12.64 |
|                                                                                            |  | >2000.00 PL                              | 57  | 50.00 | 41  | 35.96 | 16 | 14.04 |

|        |                    | Would you like to try insects in an invisible form—flour added to burger? (question 14)                            |       |     |       |    |       |
|--------|--------------------|--------------------------------------------------------------------------------------------------------------------|-------|-----|-------|----|-------|
| Sex    | woman              | 105                                                                                                                | 35.71 | 145 | 49.32 | 44 | 14.97 |
|        | man                | 81                                                                                                                 | 50.63 | 62  | 38.75 | 17 | 10.63 |
| Income | 500.00–1000.00 PL  | 35                                                                                                                 | 31.82 | 62  | 56.36 | 13 | 11.82 |
|        | 1000.01–1500.00 PL | 56                                                                                                                 | 39.16 | 59  | 41.26 | 28 | 19.58 |
|        | 1500.01–2000.00 PL | 39                                                                                                                 | 44.83 | 42  | 48.28 | 6  | 6.90  |
|        | >2000.00 PL        | 56                                                                                                                 | 49.12 | 44  | 38.60 | 14 | 12.28 |
|        |                    | Would you like to try insects in an invisible form—flour added to paté? (question 14)                              |       |     |       |    |       |
| Sex    | woman              | 74                                                                                                                 | 25.17 | 178 | 60.54 | 42 | 14.29 |
|        | man                | 60                                                                                                                 | 37.50 | 81  | 50.63 | 19 | 11.88 |
| Income | 500.00–1000.00 PL  | 28                                                                                                                 | 25.45 | 73  | 66.36 | 9  | 8.18  |
|        | 1000.01–1500.00 PL | 36                                                                                                                 | 25.17 | 76  | 53.15 | 31 | 21.68 |
|        | 1500.01–2000.00 PL | 29                                                                                                                 | 33.33 | 50  | 57.47 | 8  | 9.20  |
|        | >2000.00 PL        | 41                                                                                                                 | 35.96 | 60  | 52.63 | 13 | 11.40 |
|        |                    | Would you use edible insects if you knew that: insects are easy to prepare? (question 15)                          |       |     |       |    |       |
| Sex    | woman              | 45                                                                                                                 | 15.31 | 186 | 63.27 | 63 | 21.43 |
|        | man                | 48                                                                                                                 | 30.00 | 67  | 41.88 | 45 | 28.13 |
| Income | 500.00–1000.00 PL  | 17                                                                                                                 | 15.45 | 75  | 68.18 | 18 | 16.36 |
|        | 1000.01–1500.00 PL | 25                                                                                                                 | 17.48 | 78  | 54.55 | 40 | 27.97 |
|        | 1500.01–2000.00 PL | 23                                                                                                                 | 26.44 | 45  | 51.72 | 19 | 21.84 |
|        | >2000.00 PL        | 28                                                                                                                 | 24.56 | 55  | 48.25 | 31 | 27.19 |
|        |                    | Would you use edible insects if you knew that: do not require long heat treatment? (question 15)                   |       |     |       |    |       |
| Sex    | woman              | 41                                                                                                                 | 13.95 | 195 | 66.33 | 58 | 19.73 |
|        | man                | 47                                                                                                                 | 29.38 | 70  | 43.75 | 43 | 26.88 |
| Income | 500.00–1000.00 PL  | 17                                                                                                                 | 15.45 | 78  | 70.91 | 15 | 13.64 |
|        | 1000.01–1500.00 PL | 22                                                                                                                 | 15.38 | 79  | 55.24 | 42 | 29.37 |
|        | 1500.01–2000.00 PL | 23                                                                                                                 | 26.44 | 45  | 51.72 | 19 | 21.84 |
|        | >2000.00 PL        | 26                                                                                                                 | 22.81 | 63  | 55.26 | 25 | 21.93 |
|        |                    | Would you use edible insects if you knew that: they can be bought near the place of residence? (question 15)       |       |     |       |    |       |
| Sex    | woman              | 53                                                                                                                 | 18.03 | 185 | 62.93 | 56 | 19.05 |
|        | man                | 56                                                                                                                 | 35.00 | 64  | 40.00 | 40 | 25.00 |
| Income | 500.00–1000.00 PL  | 14                                                                                                                 | 14.29 | 69  | 70.41 | 15 | 15.31 |
|        | 1000.01–1500.00 PL | 29                                                                                                                 | 20.28 | 76  | 53.15 | 38 | 26.57 |
|        | 1500.01–2000.00 PL | 26                                                                                                                 | 29.89 | 45  | 51.72 | 16 | 18.39 |
|        | >2000.00 PL        | 33                                                                                                                 | 28.95 | 55  | 48.25 | 26 | 22.81 |
|        |                    | Would you use edible insects if you knew that: they are easily available in stores and supermarkets? (question 15) |       |     |       |    |       |
| Sex    | woman              | 56                                                                                                                 | 19.05 | 177 | 60.20 | 61 | 20.75 |
|        | man                | 59                                                                                                                 | 36.88 | 61  | 38.13 | 40 | 25.00 |

|        |                    |                                                                                                                  |       |     |       |     |       |
|--------|--------------------|------------------------------------------------------------------------------------------------------------------|-------|-----|-------|-----|-------|
| Income | 500.00–1000.00 PL  | 24                                                                                                               | 21.82 | 69  | 62.73 | 17  | 15.45 |
|        | 1000.01–1500.00 PL | 27                                                                                                               | 18.88 | 76  | 53.15 | 40  | 27.97 |
|        | 1500.01–2000.00 PL | 30                                                                                                               | 34.48 | 39  | 44.83 | 18  | 20.69 |
|        | >2000.00 PL        | 34                                                                                                               | 29.82 | 54  | 47.37 | 26  | 22.81 |
| Sex    |                    | Should insects be included in Western diets to solve problems with: food security? (question 16)                 |       |     |       |     |       |
|        | woman              | 52                                                                                                               | 17.69 | 107 | 36.39 | 135 | 45.92 |
|        | man                | 48                                                                                                               | 30.00 | 47  | 29.38 | 65  | 40.63 |
| Sex    |                    | Should insects be included in Western diets to solve problems with: environmental sustainability? (question 16)  |       |     |       |     |       |
|        | woman              | 71                                                                                                               | 24.15 | 107 | 36.39 | 116 | 39.46 |
|        | man                | 63                                                                                                               | 39.38 | 38  | 23.75 | 59  | 36.88 |
| Sex    |                    | Should insects be included in Western diets to solve problems with: reduced food wastage? (question 16)          |       |     |       |     |       |
|        | woman              | 91                                                                                                               | 30.95 | 84  | 28.57 | 119 | 40.48 |
|        | man                | 80                                                                                                               | 50.00 | 28  | 17.50 | 52  | 32.50 |
| Sex    |                    | Should insects be included in Western diets to solve problems with: scarcity of agricultural land? (question 16) |       |     |       |     |       |
|        | woman              | 87                                                                                                               | 29.59 | 82  | 27.89 | 125 | 42.52 |
|        | man                | 72                                                                                                               | 45.00 | 34  | 21.25 | 54  | 33.75 |

Data are presented as: n (number of respondents) and % (percentages).
